# Supplementary material for: Increasing heat transfer performance of thermoplastic polyurethane by constructing thermal conduction channels of ultra-thin boron nitride nanosheets and carbon nanotubes
Source: Royal Society of Chemistry journal article supplement (doi:10.1039/d0nj04215c), 2020-01-01
Supplement: d0nj04215c1.pdf [file d0nj04215c1.pdf]

## Supporting Information

# Increasing Heat Transfer Performance of Thermoplastic Polyurethane by Constructing Thermal Conduction Channels of Ultra-thin Boron Nitride Nanosheets and Carbon Nanotubes

*Yue Ruan,<sup>a, b</sup> Nian Li,<sup>a, c</sup> Cui Liu,<sup>a, c</sup> Liqing Chen,<sup>a, b</sup> Shudong Zhang,<sup>a, c,\*</sup> Zhenyang  
Wang<sup>a, c,\*</sup>*

<sup>†</sup>Institute of Solid State Physics, Hefei Institutes of Physical Science, Chinese Academy  
of Sciences, Hefei, Anhui 230031, China

<sup>‡</sup>Department of Chemistry, University of Science and Technology of China, Hefei,  
Anhui 230026, China

<sup>#</sup>Key Laboratory of Photovoltaic and Energy Conservation Materials, Hefei Institutes  
of Physical Science, Chinese Academy of Sciences, Hefei 230031, China

\*Corresponding Author

E-mail: zywang@iim.ac.cn, sdzhang@iim.ac.cn

**KEYWORDS:** h-BNNSs; CNTs; TPU; TIMs; multi-path; thermal conductivity

## *Table of Contents*

|                                                                                                                                                                                                                                                                                                                                                                                                          |            |
|----------------------------------------------------------------------------------------------------------------------------------------------------------------------------------------------------------------------------------------------------------------------------------------------------------------------------------------------------------------------------------------------------------|------------|
| <b>Figure S1</b>                                                                                                                                                                                                                                                                                                                                                                                         | <b>S-3</b> |
| Mechanism diagram of h-BNNSs exfoliation starting from the bulk h-BN.                                                                                                                                                                                                                                                                                                                                    |            |
| <b>Figure S2</b>                                                                                                                                                                                                                                                                                                                                                                                         | <b>S-3</b> |
| The comparison of solubility between h-BN and h-BNNSs.                                                                                                                                                                                                                                                                                                                                                   |            |
| <b>Figure S3</b>                                                                                                                                                                                                                                                                                                                                                                                         | <b>S-3</b> |
| The comparison of Tyndall phenomenon between h-BN and h-BNNSs.                                                                                                                                                                                                                                                                                                                                           |            |
| <b>Figure S4</b>                                                                                                                                                                                                                                                                                                                                                                                         | <b>S-4</b> |
| Morphological characteristics of h-BNNSs after exfoliation. (a) Low magnification TEM images of exfoliated h-BNNSs obtained by hydrothermal exfoliation method; (b) TEM image of the edge of h-BNNSs; (c) HRTEM image of the h-BNNSs with the clear lattice fringes; (d) A representative SAED pattern of h-BNNSs; (e) AFM topography image of h-BNNSs; (f) Cross-sectional analysis diagram of h-BNNSs. |            |
| <b>Figure S5</b>                                                                                                                                                                                                                                                                                                                                                                                         | <b>S-4</b> |
| Elongation at break of h-BNNSs/CNTs/TPU composites with different TPU contents. $\varepsilon$ is elongation at break; L is the original length of the sample and $\Delta L$ is the difference between the stretched length and the original length.                                                                                                                                                      |            |
| <b>Figure S6</b>                                                                                                                                                                                                                                                                                                                                                                                         | <b>S-5</b> |
| The XRD patterns of the h-BN and h-BNNSs.                                                                                                                                                                                                                                                                                                                                                                |            |
| <b>Figure S7</b>                                                                                                                                                                                                                                                                                                                                                                                         | <b>S-5</b> |
| The XRD patterns of the CNTs before and after acidification.                                                                                                                                                                                                                                                                                                                                             |            |
| <b>Figure S8</b>                                                                                                                                                                                                                                                                                                                                                                                         | <b>S-5</b> |
| XRD patterns of h-BNNSs, TPU, CNTs and the h-BNNSs/CNTs/TPU composite membrane.                                                                                                                                                                                                                                                                                                                          |            |
| <b>Figure S9</b>                                                                                                                                                                                                                                                                                                                                                                                         | <b>S-6</b> |
| FTIR spectra of h-BNNSs, CNTs, TPU and the h-BNNSs/CNTs/TPU composite membrane.                                                                                                                                                                                                                                                                                                                          |            |
| <b>Figure S10</b>                                                                                                                                                                                                                                                                                                                                                                                        | <b>S-6</b> |
| FTIR spectra of h-BNNSs and the h-BNNSs/CNTs/TPU composite.                                                                                                                                                                                                                                                                                                                                              |            |

|                                                                                                                                                                                                              |            |
|--------------------------------------------------------------------------------------------------------------------------------------------------------------------------------------------------------------|------------|
| <b>Figure S11</b>                                                                                                                                                                                            | <b>S-7</b> |
| FTIR spectra of TPU and the h-BNNSs/CNTs/TPU composite membrane.                                                                                                                                             |            |
| <b>Figure S12</b>                                                                                                                                                                                            | <b>S-7</b> |
| FTIR spectra of CNTs before and after acidification.                                                                                                                                                         |            |
| <b>Figure S13</b>                                                                                                                                                                                            | <b>S-7</b> |
| Thermogravimetric analysis curves of h-BNNSs/CNTs/TPU composite membrane with different mass fractions of TPU.                                                                                               |            |
| <b>Figure S14</b>                                                                                                                                                                                            | <b>S-8</b> |
| Thermogravimetric analysis curves of h-BNNSs and CNTs.                                                                                                                                                       |            |
| <b>Figure S15</b>                                                                                                                                                                                            | <b>S-8</b> |
| Thermal conductivity enhancements and thermal diffusivity enhancements of h-BNNSs/CNTs/TPU composite membrane with different h-BNNS <sub>X</sub> /CNT <sub>Y</sub> content ratio via transverse measurement. |            |
| <b>Figure S16</b>                                                                                                                                                                                            | <b>S-8</b> |
| Thermal conductivity and thermal diffusivity of h-BNNSs/CNTs/TPU composite membrane with different content ratio of h-BNNS <sub>X</sub> /CNT <sub>Y</sub> by lateral measurement.                            |            |

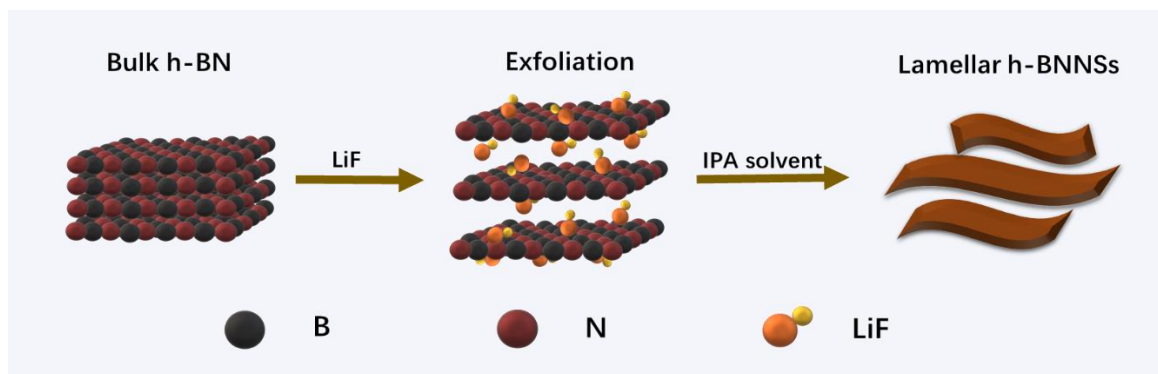

**Figure S1.** Mechanism diagram of h-BNNSs exfoliation starting from the bulk h-BN.

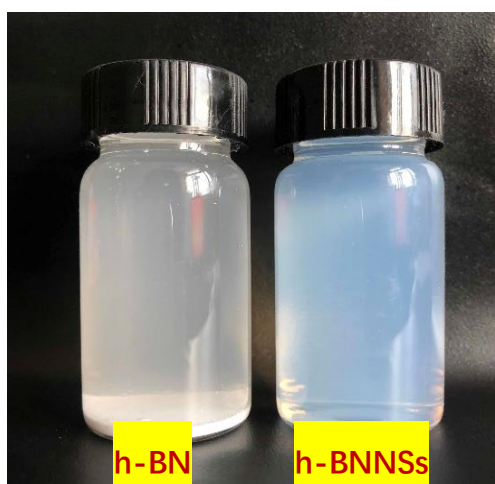

**Figure S2.** The comparison of solubility between h-BN and h-BNNSs.

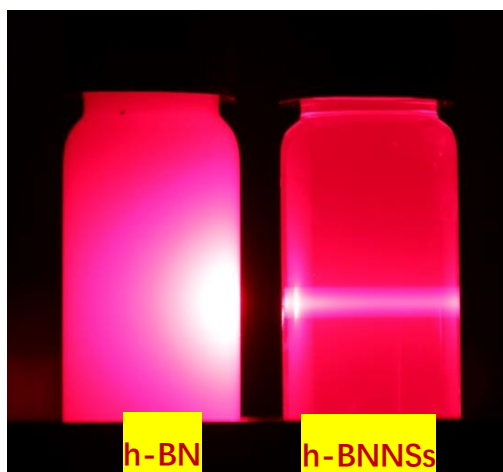

**Figure S3.** The comparison of Tyndall phenomenon between h-BN and h-BNNSs.

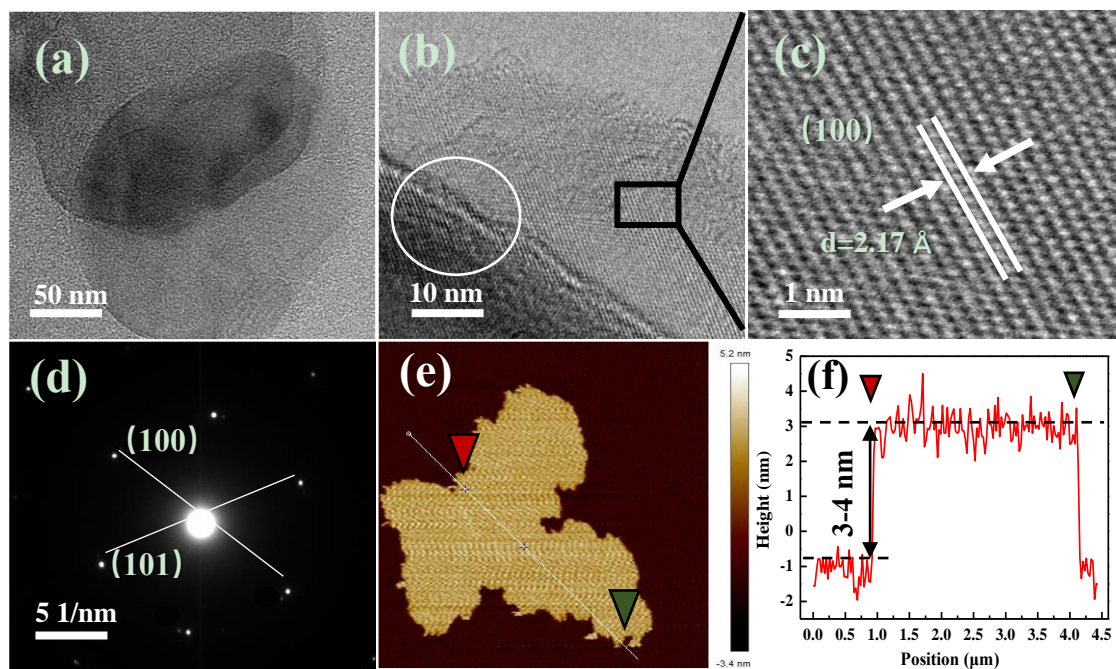

**Figure S4.** Morphological characteristics of h-BNNSs after exfoliation. (a) Low magnification TEM images of exfoliated h-BNNSs obtained by hydrothermal exfoliation method; (b) TEM image of the edge of h-BNNSs; (c) HRTEM image of the h-BNNSs with the clear lattice fringes; (d) A representative SAED pattern of h-BNNSs; (e) AFM topography image of h-BNNSs; (f) Cross-sectional analysis diagram of h-BNNSs.

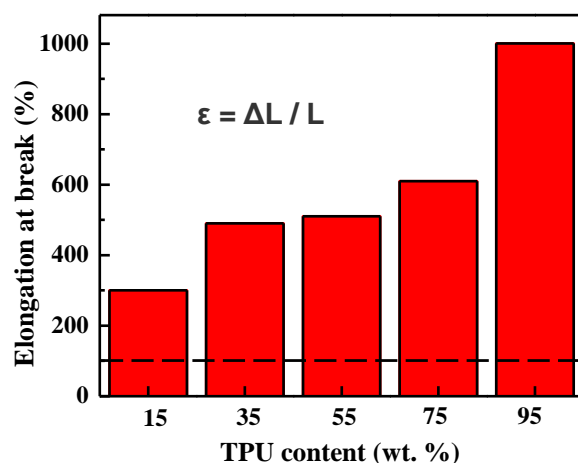

**Figure S5.** Elongation at break of h-BNNSs/CNTs/TPU composites with different TPU contents.  $\epsilon$  is elongation at break;  $L$  is the original length of the sample and  $\Delta L$  is the difference between the stretched length and the original length.

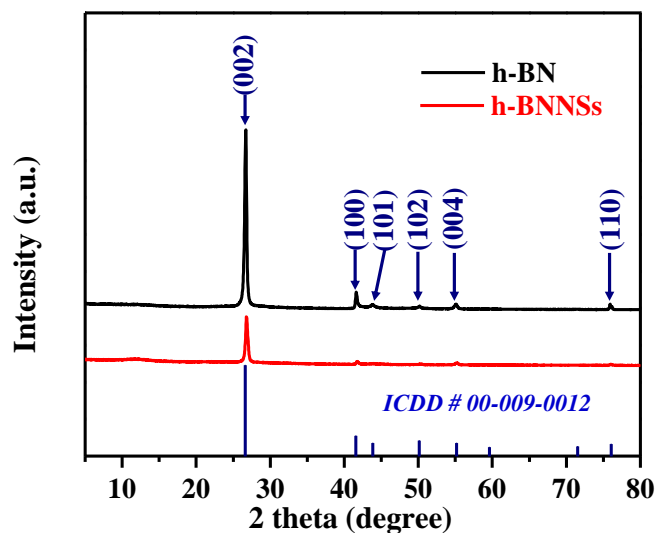

Figure S6. The XRD patterns of the h-BN and h-BNNSs.

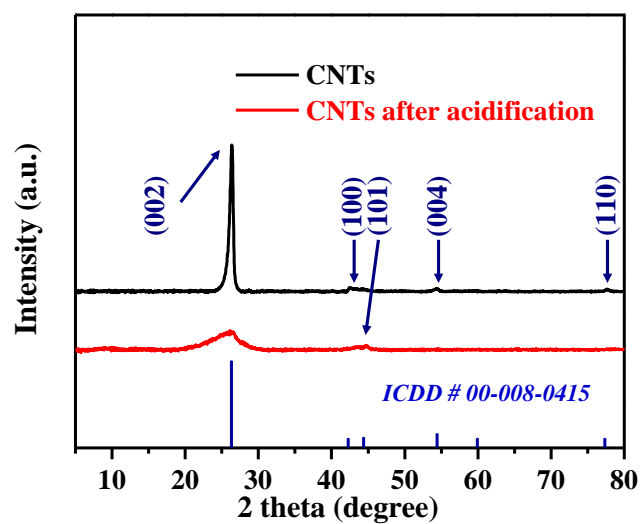

Figure S7. The XRD patterns of the CNTs before and after acidification.

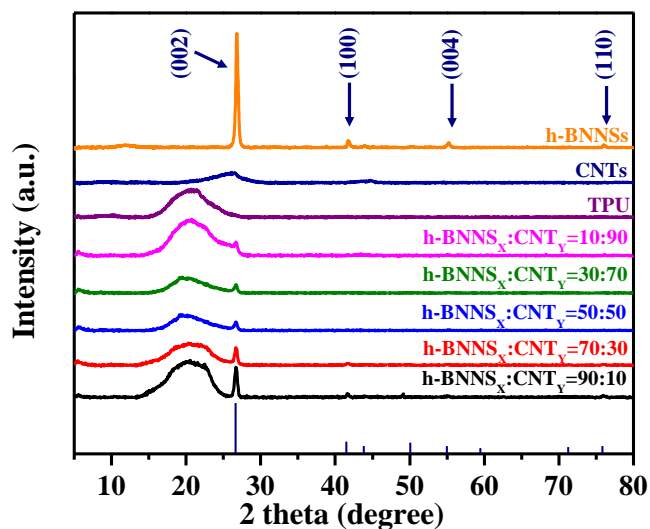

Figure S8. XRD patterns of h-BNNSs, TPU, CNTs and the h-BNNSs/CNTs/TPU

composite membrane with different h-BNNS<sub>X</sub>/CNT<sub>Y</sub> content ratio.

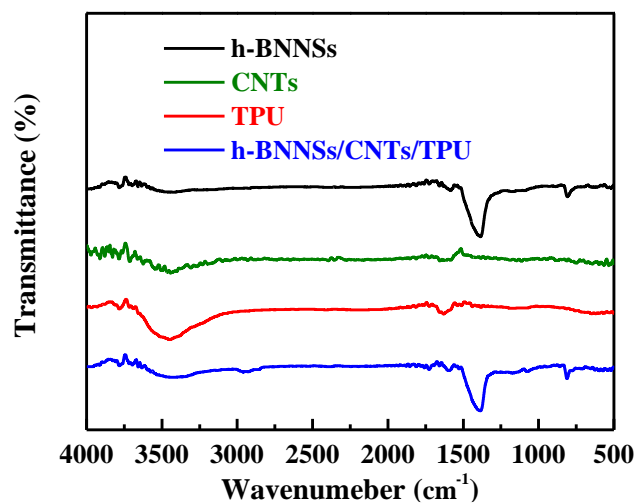

**Figure S9.** FTIR spectra of h-BNNSs, CNTs, TPU and the h-BNNSs/CNTs/TPU composite membrane.

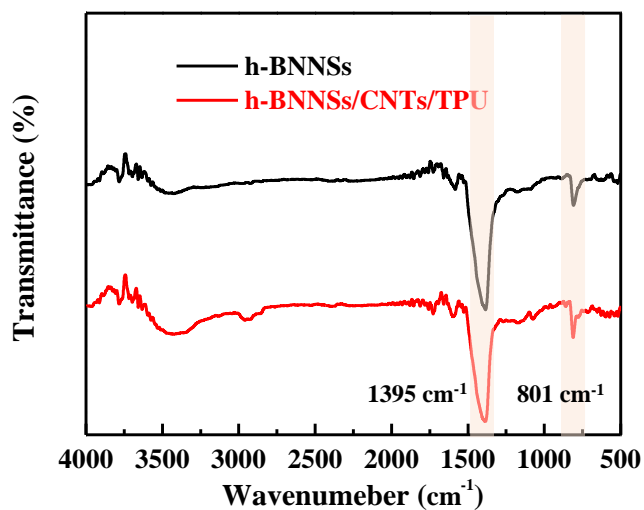

**Figure S10.** FTIR spectra of h-BNNSs and the h-BNNSs/CNTs/TPU composite membrane.

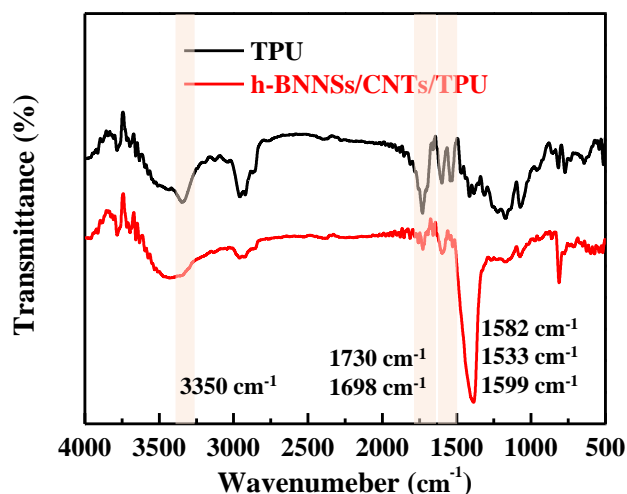

**Figure S11.** FTIR spectra of TPU and the h-BNNSs/CNTs/TPU composite membrane.

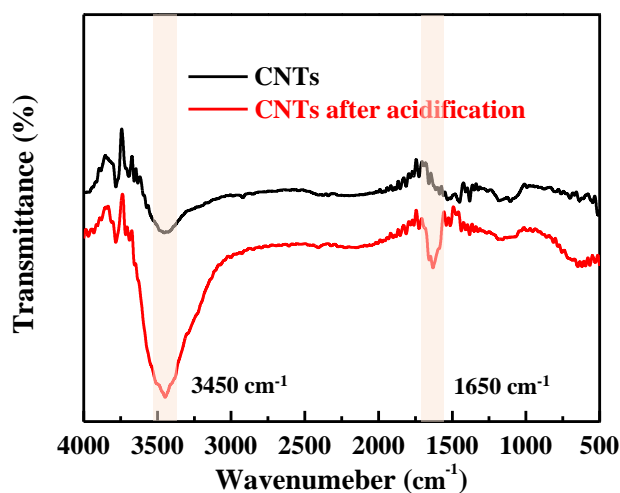

**Figure S12.** FTIR spectra of CNTs before and after acidification.

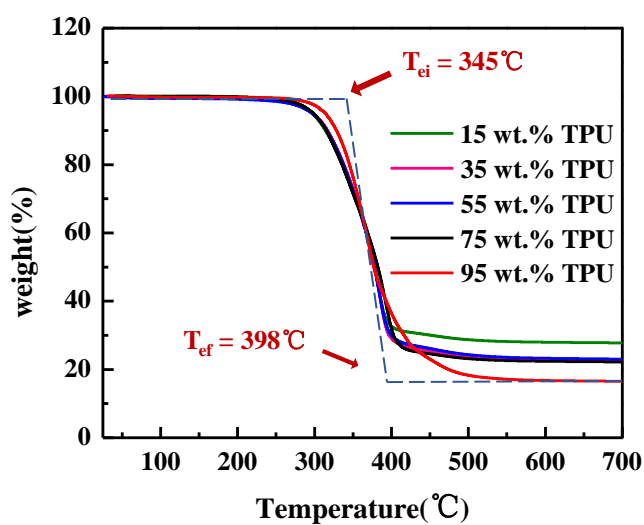

**Figure S13.** Thermogravimetric analysis curves of h-BNNSs/CNTs/TPU composite membrane with different mass fractions of TPU.



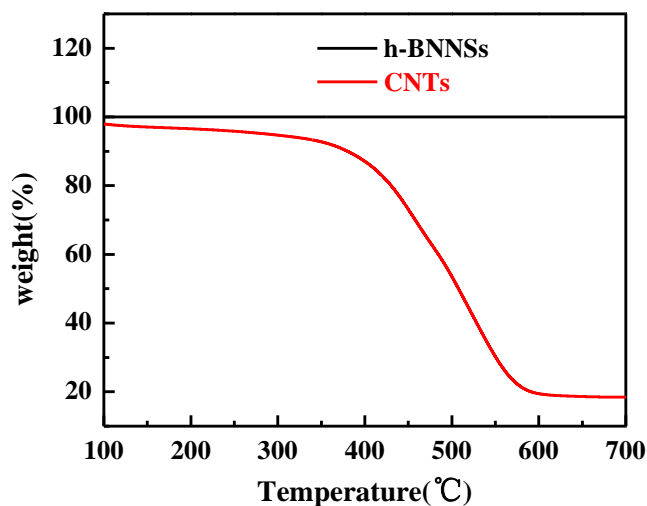

**Figure S14.** Thermogravimetric analysis curves of h-BNNSs and CNTs.

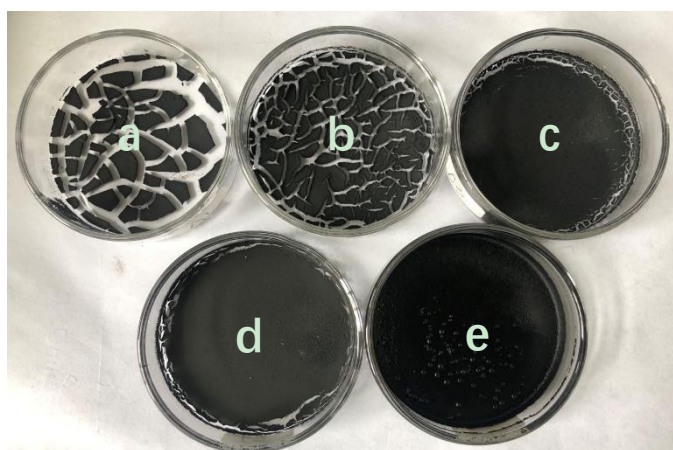

**Figure S15.** Five types of h-BNNSs/CNTs/TPU composite membrane with TPU content of (a) 15 wt.%; (b) 20 wt.%; (c) 25 wt.%; (d) 30 wt.%; and (e) 35 wt.%, respectively.

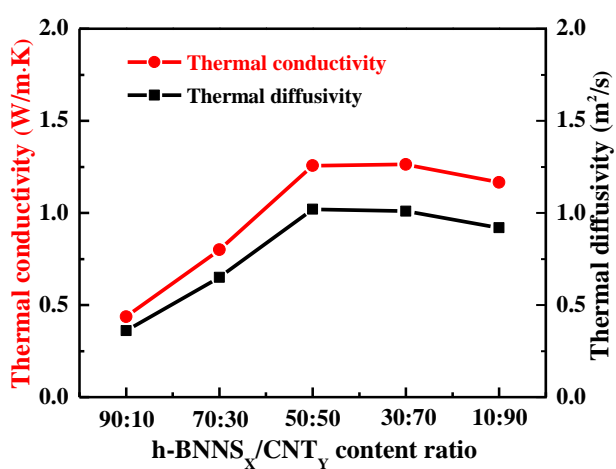

**Figure S16.** Thermal conductivity and thermal diffusivity of h-BNNSs/CNTs/TPU composite membrane with different content ratio of h-BNNS<sub>x</sub>/CNT<sub>y</sub> by lateral

measurement.
